# Supplementary material for: BPTI folding revisited: switching a disulfide into methylene thioacetal reveals a previously hidden path.
Source: Royal Society of Chemistry journal article supplement (doi:10.1039/c8sc01110a), 2018-06-07
Supplement: c8sc01110a1.pdf [file c8sc01110a1.pdf]

## Supplementary Information

### **BPTI folding revisited: switching a disulfide bond into methylene thioacetal reveals a previously hidden path**

**Reem Mousa, Shifra Lansky, Gil Shoham and Norman Metanis\***

The Institute of Chemistry,

The Hebrew University of Jerusalem, Edmond J. Safra, Givat Ram,

Jerusalem 91904, Israel

[metanis@mail.huji.ac.il](mailto:metanis@mail.huji.ac.il)

## **Materials and Methods**

Buffers for all kinetic experiments were prepared using MilliQ water (Millipore, Merck).  $\text{Na}_2\text{HPO}_4 \cdot 12\text{H}_2\text{O}$ , tris(2-carboxyethyl)phosphine hydrochloride (TCEP·HCl), *DL*-dithiothreitol (DTT), diiodomethane, bovine  $\alpha$ -chymotrypsin and *N*-succinyl-Gly-Gly-Phe-*p*-nitroanilide substrate were purchased from Sigma-Aldrich. Ultrapure guanidinium chloride (Gn·HCl, MP Biomedicals, LLC, France) was used for unfolding experiments. Bovine pancreatic trypsin inhibitor (WT-BPTI) was a generous gift of Bachem AG. All solvents: Dimethyl sulfoxide (DMSO), acetonitrile (ACN), methanol and trifluoroacetic acid (TFA) were HPLC or UPLC grade and were purchased from Bio-Lab, Jerusalem.

### **High Performance Liquid Chromatography (HPLC)**

The analytical analyses were performed on a reverse-phase Waters Alliance HPLC with UV detector (214 or 220 nm, and 280 nm) using an X-Bridge C4 column (3.5  $\mu\text{m}$ , 4.6  $\times$  150 mm) and an Atlantis T3 column (3  $\mu\text{m}$ , 4.6  $\times$  150 mm). Semi-preparative RP-HPLC was performed on a Waters LCQ150 system using X-Bridge C8 column (5  $\mu\text{m}$ , 10  $\times$  150 mm) or X-Bridge BEH300 C4 (5  $\mu\text{m}$  19  $\times$  150 mm), accordingly. Linear gradients of acetonitrile with 0.1% TFA (buffer B) and water with 0.1% TFA (buffer A) were used for all systems to elute bound peptides. The flow rates were 1 mL/min (analytical), 3.35 and 10 mL/min (semi-preparative).

### **Electrospray Ionization Mass Spectrometry (ESI-MS) and HR-MS**

ESI-MS was performed on Thermo Scientific-LCQ Fleet Ion-Trap mass spectrometer. Peptide masses were calculated from the experimental mass to charge ( $m/z$ ) ratios from the observed multiply charged species of a peptide using MagTran v1.03.

The HR-MS were recorded on a Q-ExactivePlus Orbitrap mass spectrometer (Thermo Scientific) with a ESI source and 140'000 FWHM, in a method with AGC target set to

1E6, and scan range was 400-2800 m/z. The raw data was deconvoluted by MagTran v1.03 software.

## **Experimental Section**

### **Preparation of reduced WT-BPTI and reduced MT-BPTI**

Native, folded WT-BPTI (15 mg, 2.3  $\mu\text{mol}$ ) was dissolved in sodium phosphate buffer (100 mM, pH  $\sim$ 8) and treated with 1.5 equiv of TCEP. Within 3 h, the solvent exposed disulfide bond 14–38 was selectively reduced.<sup>1,2</sup> The reaction progress was monitored by ESI-MS and HPLC (X-Bridge C4 column, 3.5  $\mu\text{m}$ , 4.6  $\times$  150 mm) using a gradient of 15:85 to 60:40 (0.1% Buffer B: Buffer A) over 25 min. Upon completion of the reduction step, 100 fold excess of diiodomethane in DMSO was added to the reaction and stirred at 35  $^{\circ}\text{C}$  under argon.<sup>3</sup> After 22 h the reaction was quenched with 0.1% TFA in water and purified by preparative RP-HPLC (X-Bridge BEH300 C4 column, 5 $\mu\text{m}$ , 19  $\times$  150 mm) using a gradient of 15:85 to 50:50 (B: A) over 50 min. In addition to the formation of the MT-BPTI (10 mg isolated, 70% yield), regeneration of 14–38 disulfide bond to form folded WT-BPTI was observed as a minor product ( $\sim$ 8 %). The protein was dissolved in 200 mM sodium phosphate buffer, with 6 M  $\text{Gn}\cdot\text{HCl}$ , pH 7.2, and reduced with 200 equiv of DTT at 55  $^{\circ}\text{C}$  for 3 h. The reaction solution was injected into an X-Bridge BEH300 C4 column (5 $\mu\text{m}$ , 19  $\times$  150 mm) and eluted using the same method mentioned before. The pure, reduced MT-BPTI was isolated in 50% yield (5 mg). Both reduced WT-BPTI and reduced MT-BPTI fractions were lyophilized subsequently and dissolved in 10 mM HCl to a concentration of 546  $\mu\text{M}$  and 526  $\mu\text{M}$ , respectively. The concentration of the proteins was determined by Thermo Scientific Evolution<sup>TM</sup> 201 UV-Visible spectrophotometer.  $\epsilon_{280}$  of WT-BPTI analogs is 5400  $\text{cm}^{-1}\text{M}^{-1}$ .

To produce the reduced WT-BPTI, 10 mg (1.5  $\mu\text{mol}$ ) of folded WT-BPTI was dissolved in 200 mM sodium phosphate, containing 6 M  $\text{Gn}\cdot\text{HCl}$ , at pH 7.2 in the presence of 200 equiv of DTT. Within 5 h the reaction was quenched with 0.1% TFA in water and injected into an X-Bridge BEH300 C4 column (5  $\mu\text{m}$ , 19  $\times$  150 mm) for purification as described above, and the reduced WT-BPTI was eluted and lyophilized in 50% yield (5 mg).

### **Oxidative folding of reduced WT-BPTI and reduced MT-BPTI (standard conditions)**

The oxidative folding experiments performed according to the work of Weissman and Kim.<sup>4-6</sup> The folding reactions were performed in an anaerobic chamber (Coy Laboratories Inc.) under nitrogen and hydrogen atmosphere (95%:5%) in degassed phosphate buffer (100 mM sodium phosphate, 150 mM NaCl, 1 mM EDTA, pH 7.3) or Tris·HCl buffer (100 mM Tris·HCl, 200 mM KCl, 1mM EDTA, pH 8.7). Oxidized glutathione (GSSG, 5 equiv, final concentration 150  $\mu$ M for WT-BPTI and 100  $\mu$ M for MT-BPTI) was added to 30  $\mu$ M of reduced WT-BPTI and 20  $\mu$ M of reduced MT-BPTI, respectively. At various time intervals, 80  $\mu$ L aliquots were removed and quenched with 30  $\mu$ L of 2 M HCl, and stored at -20°C before analysis by analytical HPLC. The reaction mixture was injected into Atlantis T3 column (3  $\mu$ m 4.6  $\times$  150 mm heated to 40°C) and eluted from the column by 10:90 to 26.5:73.5 gradient over 5 min (B:A), and increasing to 40:60 over 20 min. All chromatograms were monitored at a wavelength of 214 nm.

### **Oxidative folding of reduced WT-BPTI and reduced MT-BPTI with 25 equiv GSSG**

The two reduced proteins were folded under similar conditions mentioned above except that here we used larger excess of GSSG (25 equiv relative to the protein concentration; final concentration 750  $\mu$ M for WT-BPTI and 500  $\mu$ M for MT-BPTI), with 30  $\mu$ M of reduced WT-BPTI and 20  $\mu$ M of reduced MT-BPTI, respectively. The reaction was performed in an anaerobic chamber as described before, and at time intervals 80  $\mu$ L aliquots were removed and quenched with 30  $\mu$ L 2 M HCl. The samples were stored at -20°C until subjected to analytical HPLC.

### **Isolation of MT-N' and MT-N\* intermediates**

Reduced MT-BPTI (2 mg, 0.3  $\mu$ mol) was dissolved in 10 mM HCl and added to phosphate buffer (100 mM sodium phosphate, 150 mM NaCl, 1 mM EDTA, pH 7.3) to final concentration of 20  $\mu$ M, and in the presence of GSSG to a final concentration 100  $\mu$ M. The folding reaction was quenched with 2 M HCl after 240 min (at this time point

MT-N' and MT-N\* are the major species). The separation of the two intermediates was done by analytical HPLC.

### **Rearrangement of MT-N' and MT-N\* intermediates**

For the rearrangement experiment, purified intermediates MT-N' and MT-N\* were separately dissolved in degassed Tris-HCl buffer (100 mM Tris-HCl, 200 mM KCl, 1 mM EDTA, pH 8.7) to a final concentration of 15  $\mu$ M in 500  $\mu$ L, in the absence of GSSG. The reaction was carried out in an anaerobic chamber under a mixture of hydrogen and nitrogen. At time intervals, 80  $\mu$ L aliquots were removed and quenched with 30  $\mu$ L 2 M HCl. The samples were stored at -20°C until subjected to analytical HPLC as described above.

### **Stability experiments of folded WT-BPTI and folded MT-BPTI**

WT-BPTI (1 mg, 0.15  $\mu$ mol) and MT-BPTI (0.5 mg, 0.08  $\mu$ mol) were dissolved in 200 mM phosphate buffer pH 7, in the presence of 2 M of Gn·HCl, and 100 equiv of DTT was added to the solution. The experiment was done under aerobic conditions at room temperature. At time intervals, 80  $\mu$ L aliquots were removed and quenched with acid. The reaction was monitored by analytical HPLC, using Atlantis T3 column (3  $\mu$ m 4.6  $\times$  150 mm, at 40°C), and eluted by 10:90 to 26.5:73.5 to 40:60 over 27 min gradient (B:A).

### **Circular dichroism (CD)**

The secondary structures of the folded proteins WT-BPTI and MT-BPTI were compared using CD spectroscopy, in the far-UV range (190 nm to 250 nm). CD measurement was performed at 25 °C in 10 mM sodium phosphate buffer, pH 7, in a 0.1 cm cuvette using MOS-500 spectropolarimeter (BioLogic). Protein concentrations were 55.5  $\mu$ M for WT-BPTI and 48.5  $\mu$ M for MT-BPTI, respectively. The spectra were recorded by averaging 5 wavelength scans in 1 nm steps, with a signal averaging time of 0.05 s and a bandwidth of 2 nm.

$$[\theta]_{MER} = \frac{\Theta(mdeg)}{10 \times l(cm) \times c(M) \times N(\#amide\ bonds)}$$

## Inhibition assays

The chymotrypsin inhibition assay<sup>7</sup> was tested with *N*-succinyl-Gly-Gly-Phe-*p*-nitroanilide (SucGGFpNA) substrate, in Tris-HCl buffer (50 mM, 20 mM CaCl<sub>2</sub>, 0.05% triton X-100, pH 8.2) at 25 °C. Protein concentration was determined by spectrophotometer ( $\epsilon_{280}$  of  $\alpha$ -chymotrypsin is 49600 cm<sup>-1</sup>M<sup>-1</sup>;<sup>8</sup>  $\epsilon_{280}$  of WT-BPTI analogs is 5400 cm<sup>-1</sup>M<sup>-1</sup>). The initial rate of *p*-nitroaniline formation was followed at 405 nm ( $\epsilon_{405}=8270$  cm<sup>-1</sup>M<sup>-1</sup>) using a Thermo Scientific Evolution™ 201 UV-Visible spectrophotometer. For the inhibition assay, 42 nM of  $\alpha$ -chymotrypsin and 40  $\mu$ M SucGGFpNA substrate were incubated with inhibitor (WT-BPTI or MT-BPTI). The initial rates ( $v_0$ ) were measured at concentrations of inhibitor varying from 0-80 nM, and were fitted to the following inhibition equation to calculate  $K_i$ :<sup>9</sup>

$$v = \frac{v_0}{2\alpha E}(\alpha E - I - K_i) + \sqrt{(K_i + \alpha E - I)^2 + 4K_i I}$$

The observed  $K_i$  values for WT-BPTI ( $12.7 \pm 0.8$  nM) and MT-BPTI ( $12.6 \pm 0.7$  nM) are practically identical within experimental error and with excellent agreement with previous literature (11 nM).<sup>7</sup>

## X-ray crystallography.

Lyophilized MT-BPTI was dissolved in triple distilled water to obtain a ~9 mg/ml solution, which was used subsequently for crystallization experiments. Optimal crystals of MT-BPTI were obtained by the hanging-drop vapor diffusion method, using 2  $\mu$ L drops with a 1:1 ratio between protein and reservoir, equilibrated over a 500  $\mu$ L reservoir solution containing 1.7 M (NH<sub>4</sub>)<sub>2</sub>SO<sub>4</sub>. These crystals appeared after 2-3 days and grew to their final size in a week. They were soaked for ~15 sec in a solution containing 25% glycerol and 75% reservoir prior to their flash-freezing in liquid nitrogen for X-ray diffraction data collection.

X-ray diffraction data were collected for one of these MT-BPTI crystals, using an Eiger X 4M detector, at the ID30A-3 beamline ( $\lambda=0.964$  Å, T=100 K) of the ESRF synchrotron (Grenoble, France). The raw diffraction images were processed, integrated, and scaled with the XDS software,<sup>10</sup> confirming a complete data set at 1.72 Å resolution belonging

to the P6<sub>4</sub>22 space group (Table S1). These data allowed a straightforward structure determination of MT-BPTI by molecular replacement, using the program Phaser<sup>11</sup> and the native WT-BPTI structure (pdb code 2HEX<sup>12</sup>) as search model, with five MT-BPTI monomers in the asymmetric unit. Modeling of the MT-BPTI structure was conducted with the program Coot,<sup>13</sup> which included the modeling of the 14–38 MT bridge in two alternate conformations, and the addition of sulfate and glycerol molecules resulting from the crystallization and cryo-protectant solutions. This manual building was accompanied by iterative cycles of concomitant refinement with phenix.refine,<sup>14</sup> resulting in a final structure with  $R_{work}$  and  $R_{free}$  values of 18.91% and 20.73%, respectively. Geometric validation of the structure was conducted with Procheck<sup>15</sup> and Molprobit<sup>16</sup>, confirming a model of good structural and stereochemical parameters, as demonstrated by root mean square deviation (RMSD) values of 0.01 Å and 1.5° for bond lengths and bond angles, respectively. The final MT-BPTI structure has been deposited in the RCSB protein data bank<sup>17</sup> under accession code **6F1F**. Further details regarding data collection, data processing, structure determination and refinement of the MT-BPTI structure are listed in Table S1.

## Supplementary Figures, Schemes and Tables

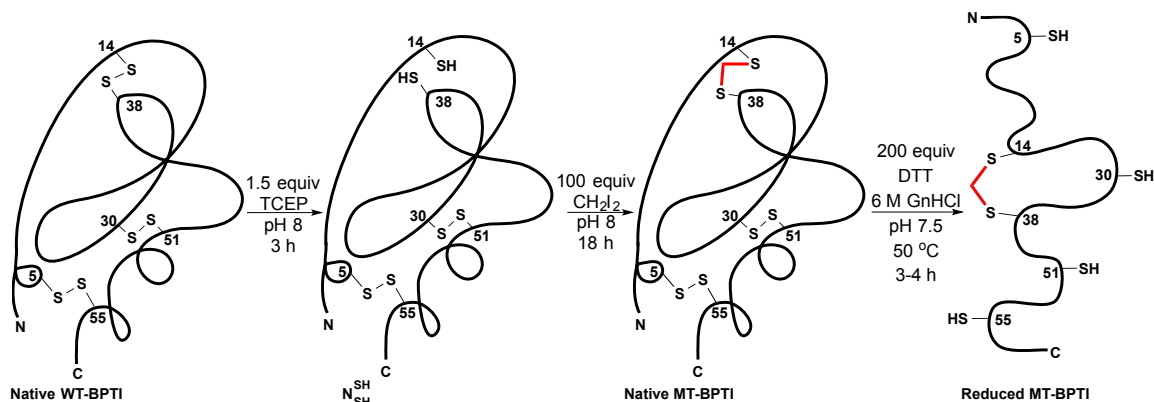

**Figure S1.** Schematic representation for the preparation of reduced MT-BPTI.

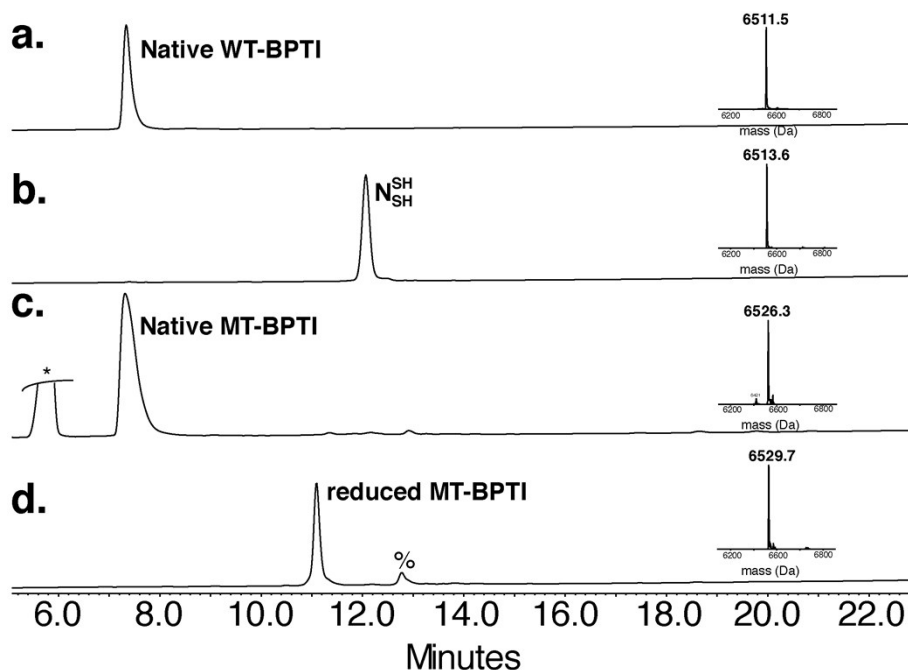

**Figure S2.** Preparation of reduced MT-BPTI. **a.** Folded WT-BPTI (mass: expected 6511.50, observed  $6511.5 \pm 1.1$  Da); **b.** Selective reduction of 14-38 disulfide bond by TCEP to form  $N_{SH}^{SH}$  [5-55, 30-51] (mass: expected 6513.5, observed  $6513.6 \pm 0.4$  Da); **c.** Alkylation of  $N_{SH}^{SH}$  by diiodomethane in DMSO to form MT-BPTI (mass: expected 6525.5, observed  $6526.3 \pm 0.7$  Da). (\*) is small molecule byproduct of the reaction; **d.** Reduced MT-BPTI (mass: expected 6529.6, observed  $6529.7 \pm 0.4$  Da) with four free Cys5/30/51 and 55, prepared by reduction with large excess of DTT at 55 °C. (%) is traces of reduced WT-BPTI.



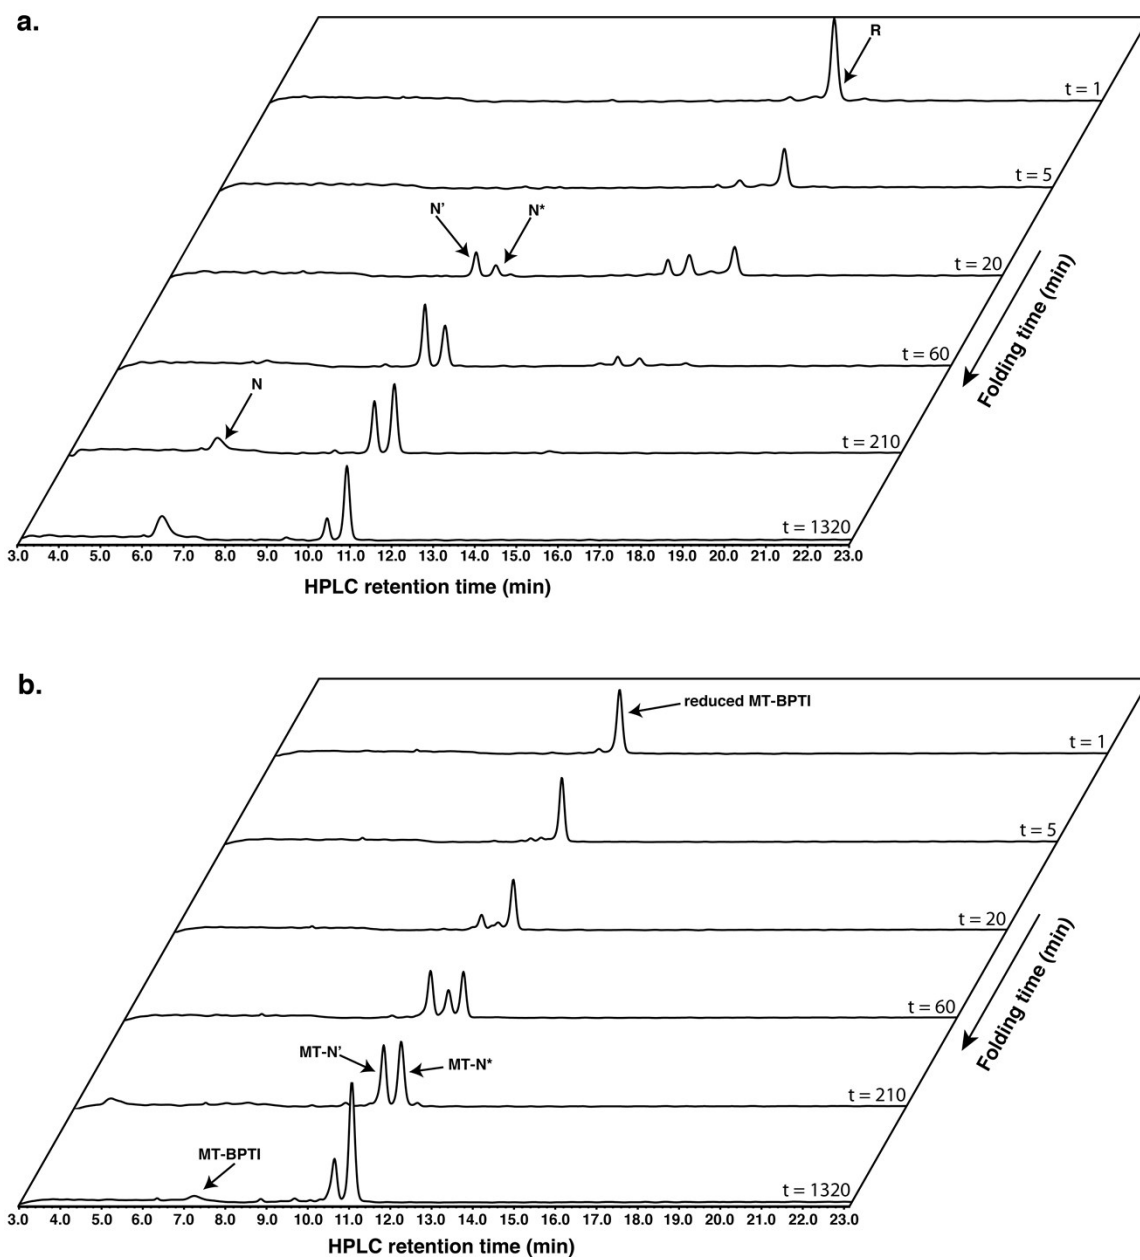

**Figure S3.** Anaerobic oxidative folding at pH 7.3 of **a.** 30  $\mu\text{M}$  reduced WT-BPTI with 150  $\mu\text{M}$  GSSG and **b.** 20  $\mu\text{M}$  reduced MT-BPTI with 100  $\mu\text{M}$  GSSG.

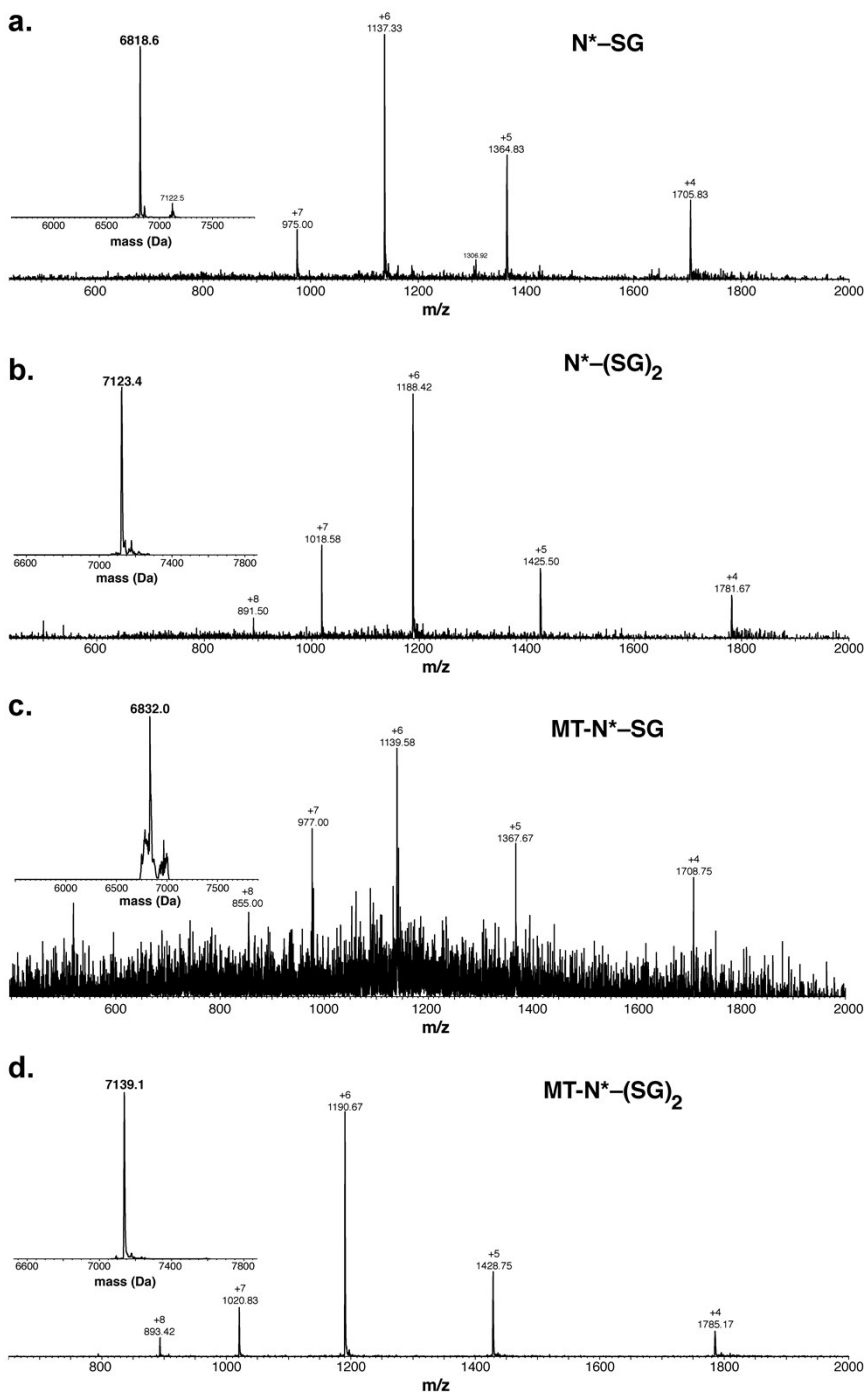

**Figure S4.** Glutathionylated intermediates of N\* and MT-N\* observed during the oxidative folding of WT-BPTI and MT-BPTI. **a.** ESI-MS of isolated N\*-SG appears at  $R_t = 9.8$  min, inset obs. mass  $6818.6 \pm 0.7$ , calc. 6818.8 Da; **b.** ESI-MS of isolated N\*-(SG)<sub>2</sub> appears at  $R_t = 8.7$  min, inset obs. mass  $7123.4 \pm 0.9$ , calc. 7124.2 Da; **c.** ESI-MS of isolated MT-N\*-SG appears at  $R_t = 9.9$  min, inset obs. mass 6832.0 Da  $\pm$  0.9, calc. 6832.9 Da; **d.** ESI-MS of isolated MT-N\*-(SG)<sub>2</sub> appears at  $R_t = 8.8$  min, inset obs. mass 7139.1 Da  $\pm$  1.0, calc. 7138.2 Da.

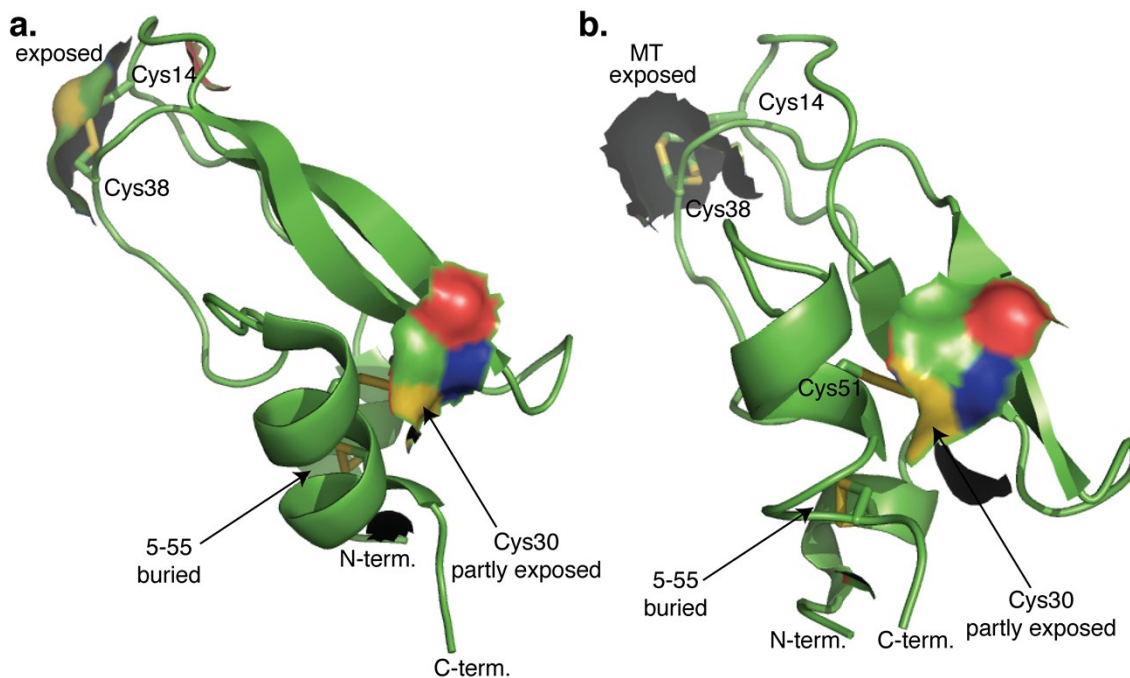

**Figure S5.** Analysis of the surface area around the disulfide bonds and MT moiety in the structures of **a.** WT-BPTI (PDB: 1BPI) and **b.** MT-BPTI (PDB: 6F1F). Both structures indicate the 14–38 disulfide/MT crosslinks are solvent exposed while 5–55 is buried. Cys30 in both structures is partly solvent exposed and hence suggested to react with GSSG in N\* to give N\*–SG and MT-N\*–SG intermediates.

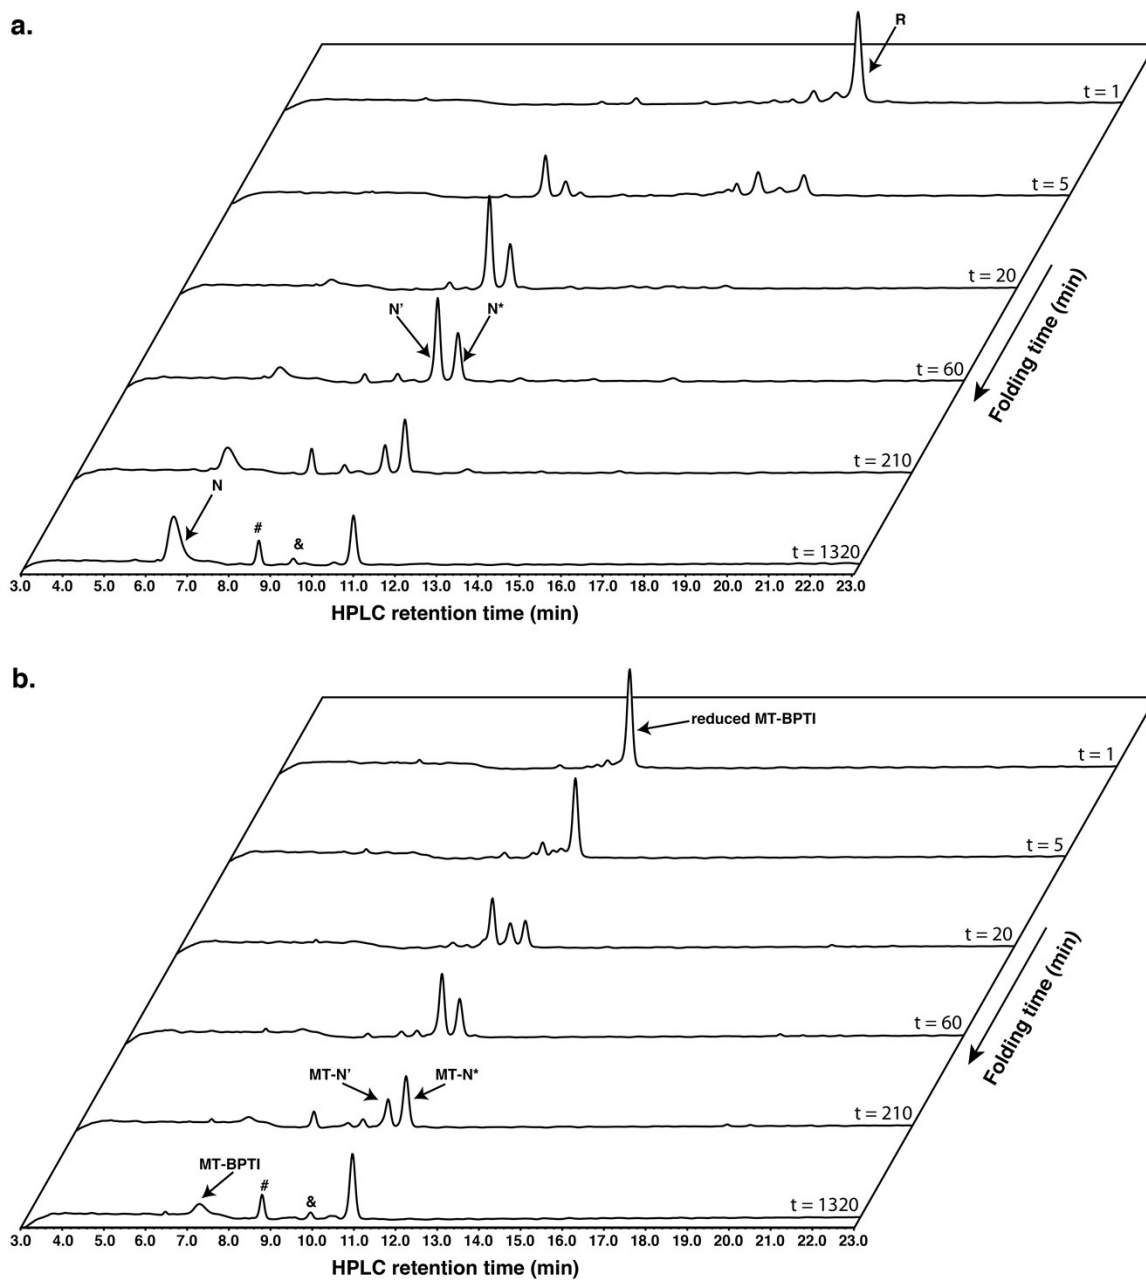

**Figure S6.** Anaerobic oxidative folding at pH 7.3 of **a.** 30  $\mu\text{M}$  reduced WT-BPTI with 750  $\mu\text{M}$  GSSG and **b.** 20  $\mu\text{M}$  reduced MT-BPTI with 500  $\mu\text{M}$  GSSG. & and # signs are MT-N\*–SG and MT-N\*–(SG)<sub>2</sub>, respectively.

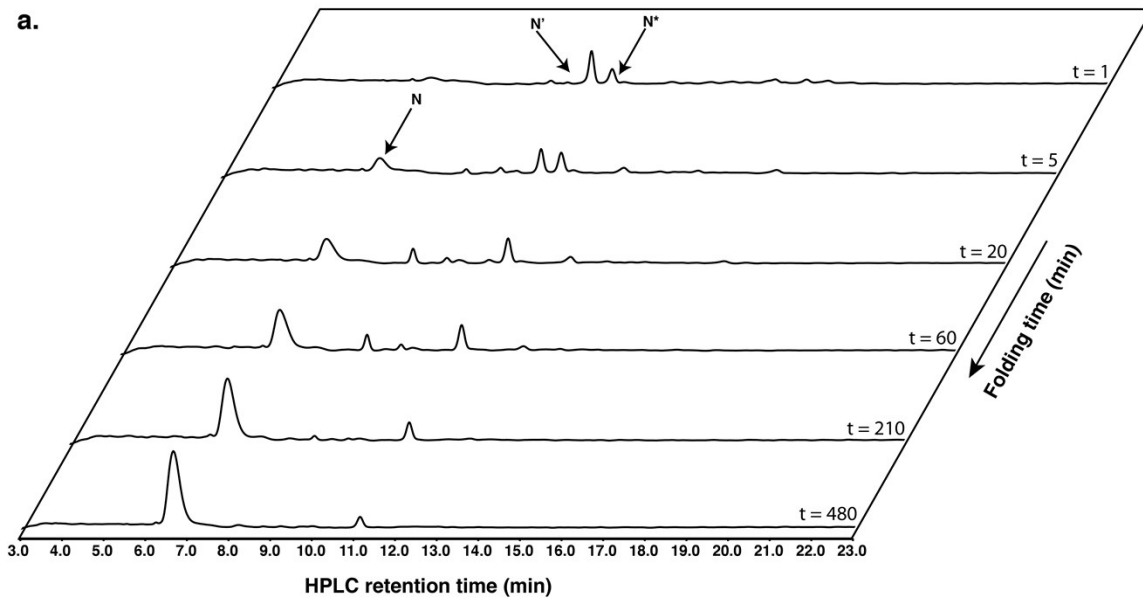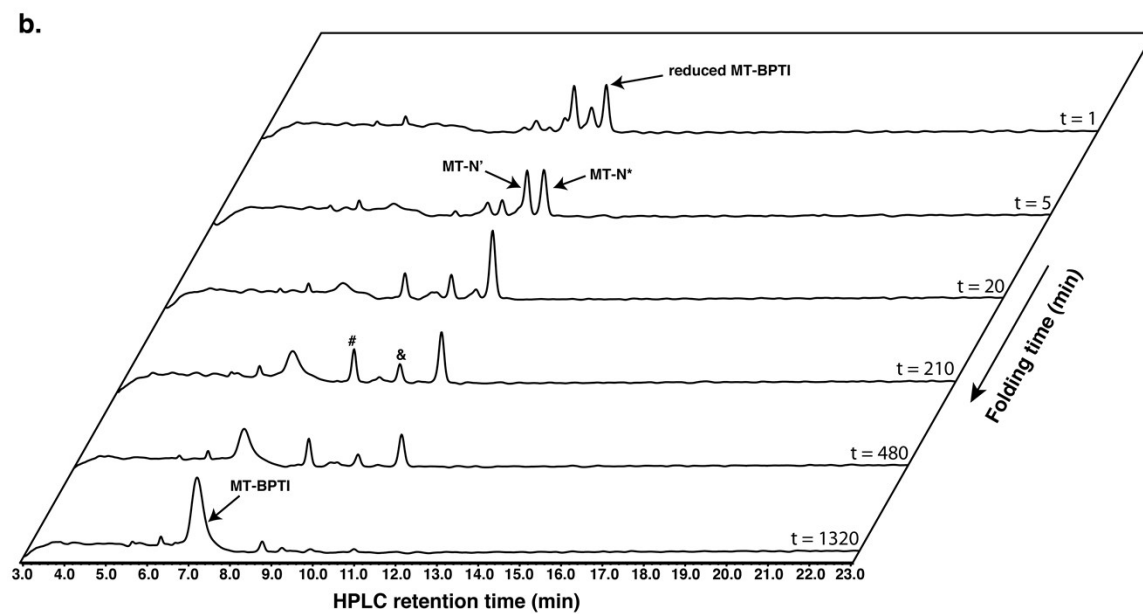

**Figure S7.** Anaerobic oxidative folding at pH 8.7 of **a.** 30  $\mu\text{M}$  reduced WT-BPTI with 750  $\mu\text{M}$  GSSG and **b.** 20  $\mu\text{M}$  reduced MT-BPTI with 500  $\mu\text{M}$  GSSG. & and # signs are MT-N\*–SG and MT-N\*–(SG)<sub>2</sub>, respectively.

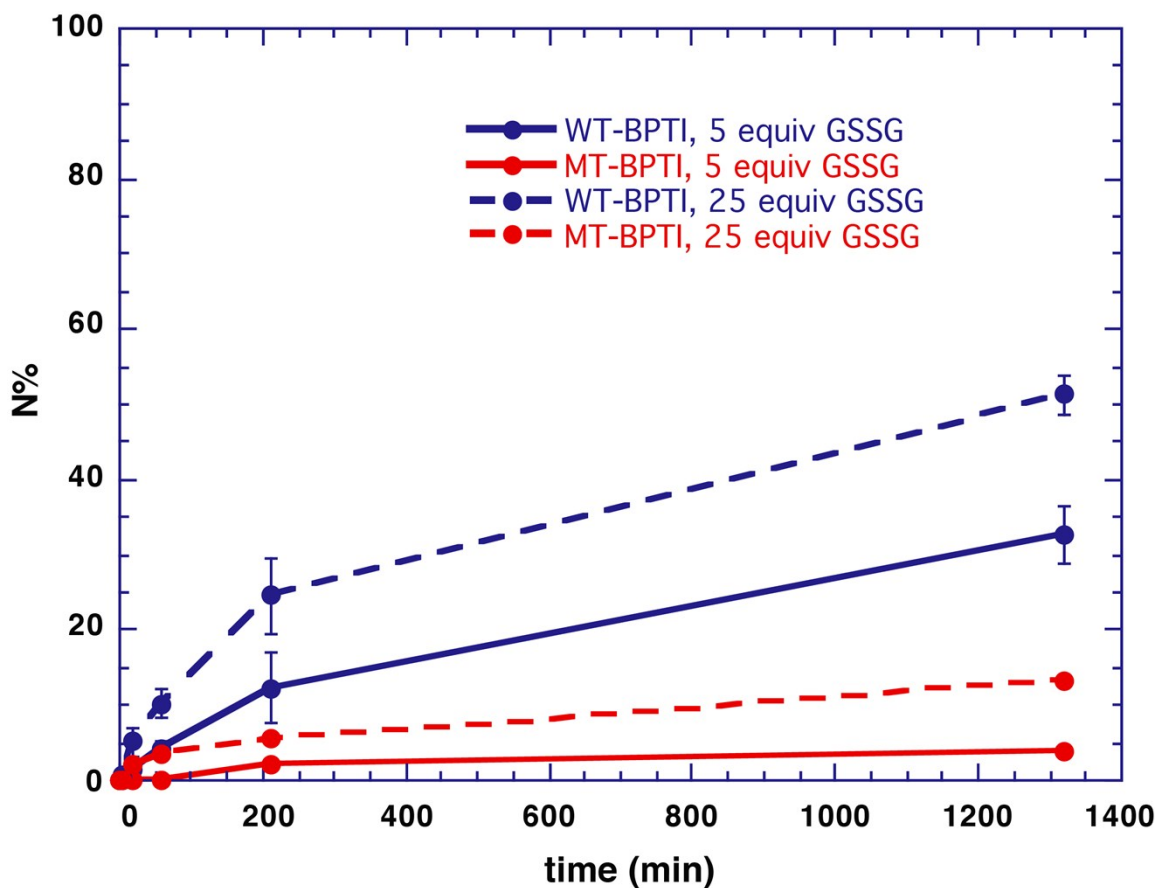

**Figure S8.** Kinetic traces of the oxidative folding reactions at pH 7.3 of reduced WT-BPTI (*blue*) and reduced MT-BPTI (*red*), in the presence of 5 equiv (*solid*) or 25 equiv (*dashed*) GSSG. The s.d. values were calculated from experiments done in triplicate and the lines connecting the data points are shown only for clarity and do not represent a data fit.

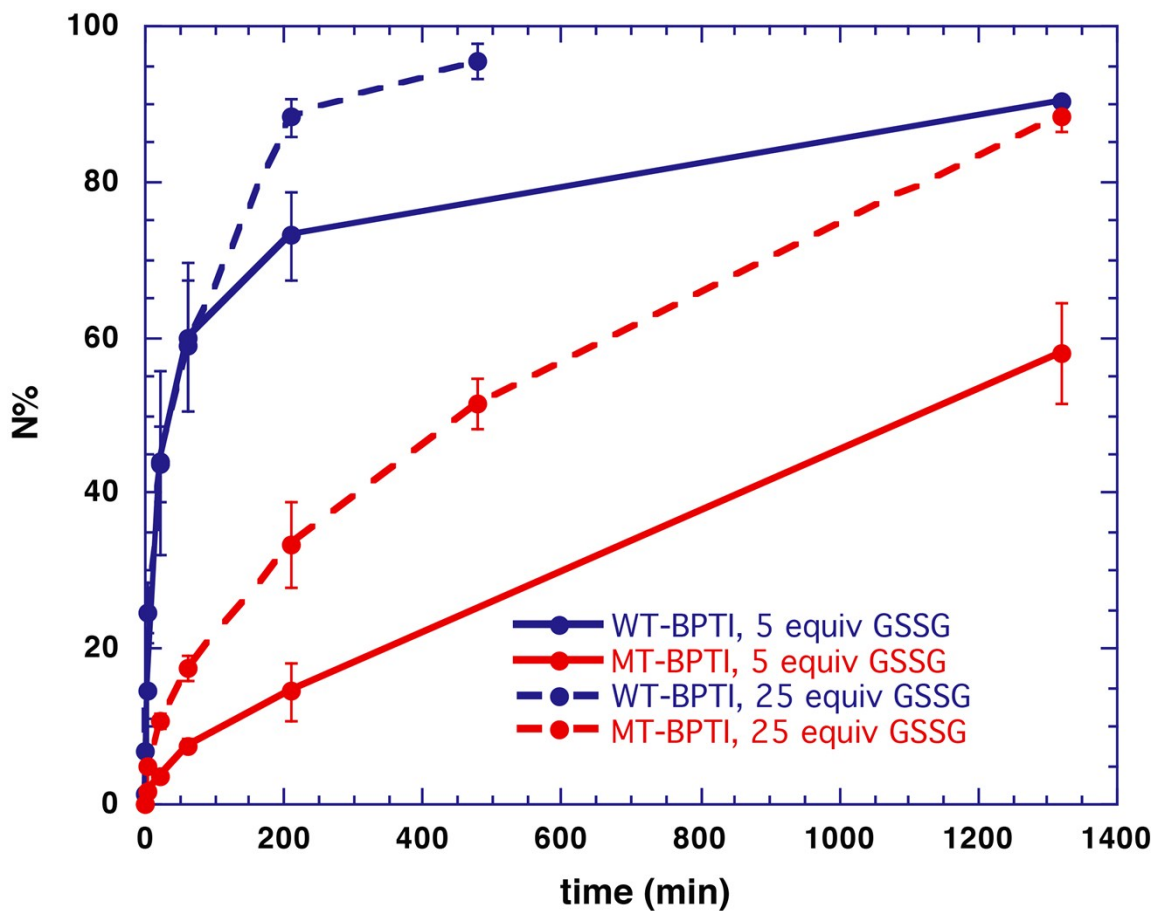

**Figure S9.** Kinetic traces of the oxidative folding reactions at pH 8.7 of reduced WT-BPTI (*blue*) and reduced MT-BPTI (*red*), in the presence of 5 equiv (*solid*) or 25 equiv (*dashed*) GSSG. The s.d. values were calculated from experiments done in triplicate and the lines connecting the data points are shown only for clarity and do not represent a data fit.

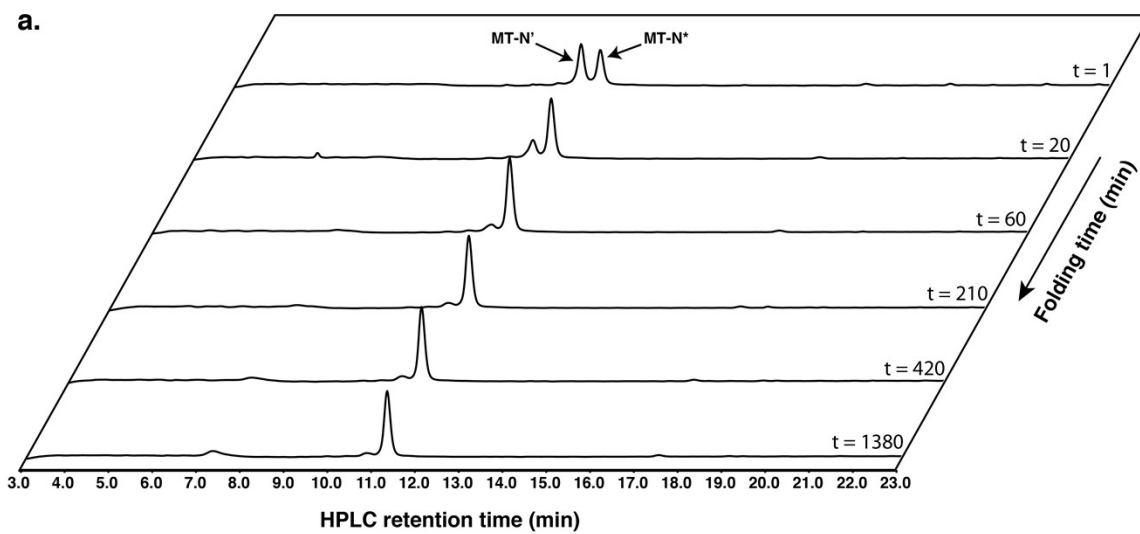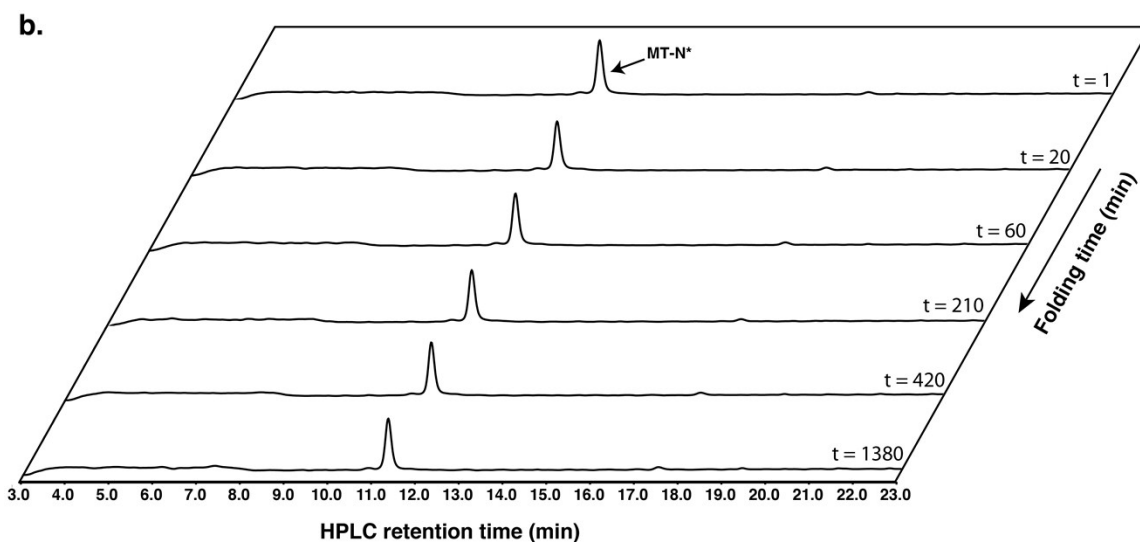

**Figure S10.** Rearrangement at pH 8.7 of **a.** 15  $\mu\text{M}$  of MT-N' and **b.** 15  $\mu\text{M}$  of MT-N\* in the absence of oxidizing agent GSSG.



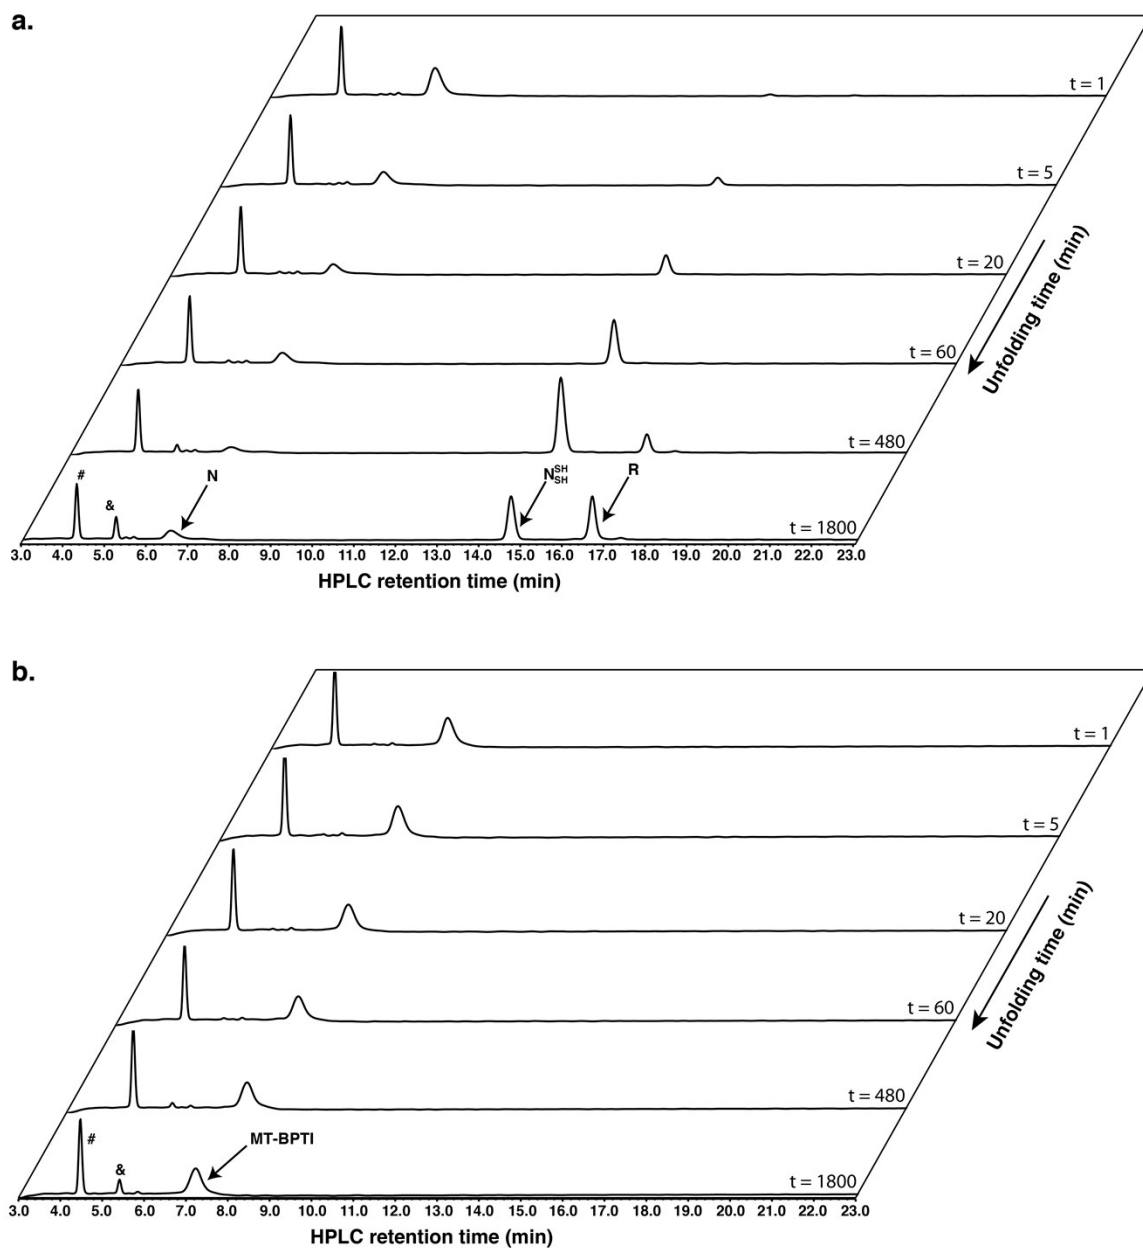

**Figure S11.** The reductive unfolding at pH 7 in the presence of 2 M of Gn·HCl and 100 equiv of DTT of **a.** 30  $\mu$ M of WT-BPTI and **b.** 30  $\mu$ M of MT-BPTI, # and & signs are reduced and oxidized DTT, respectively.

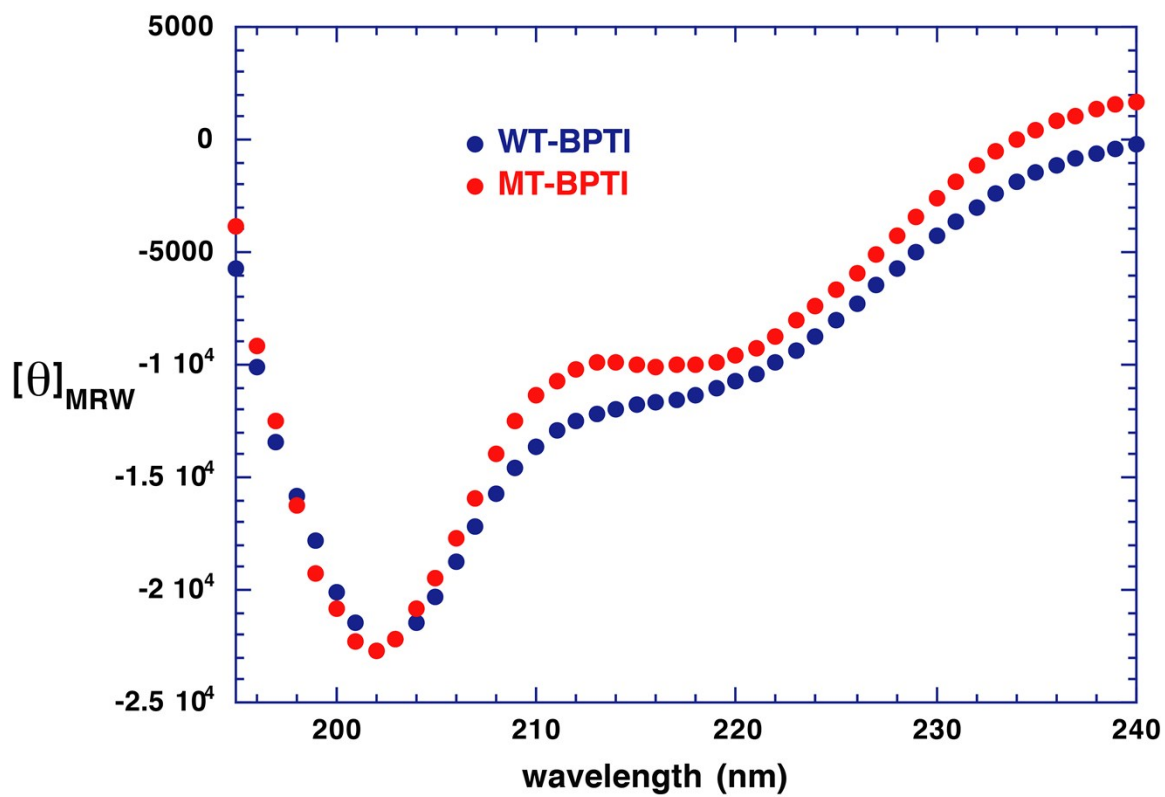

**Figure S12.** Far-UV CD spectra of WT-BPTI and MT-BPTI. WT-BPTI (55.5  $\mu\text{M}$ ) and MT-BPTI (48.5  $\mu\text{M}$ ) were each dissolved in degassed 10 mM PBS, pH 7.

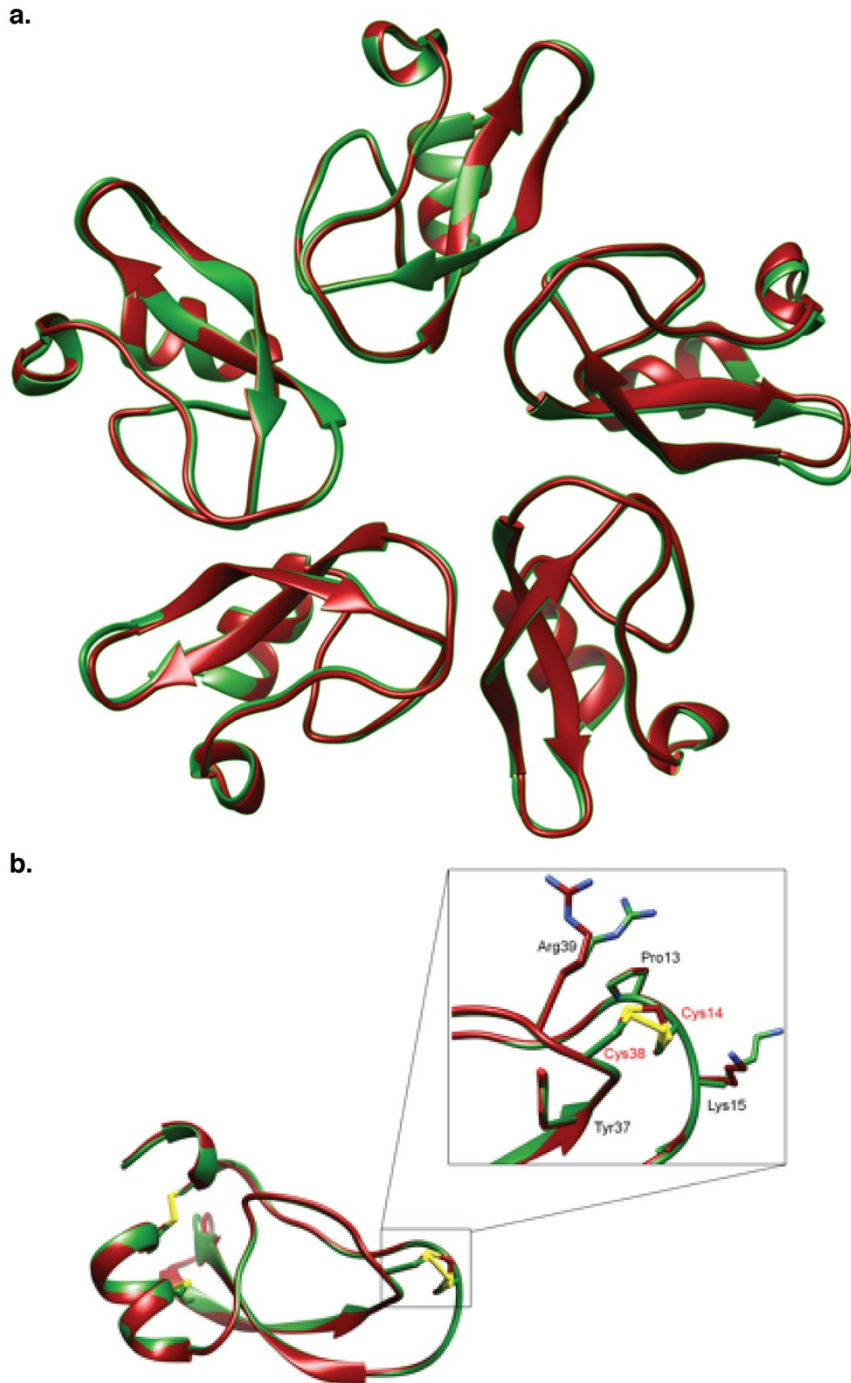

**Figure S13.** Crystal structure comparisons between WT-BPTI (PDB code 2HEX, *green*) and MT-BPTI (6F1F, *dark red*). **a.** The pentameric assembly observed in the asymmetric unit. **b.** The monomeric structure showing minor conformational changes in the backbone and side chains as a result of the MT substitution. For the sake of clarity, only one conformation for the MT bridge is shown.

**Table S1:** Data collection and processing details for the MT-BPTI structure

| <b><i>Structure determination and refinement</i></b> |                    |
|------------------------------------------------------|--------------------|
| <b><i>Data collection and processing</i></b>         |                    |
| X-ray Source                                         | ESRF ID30A-3       |
| Processing software                                  | XDS                |
| Space group                                          | P6 <sub>4</sub> 22 |
| Wavelength (Å)                                       | 0.968              |
| Rotation range (°)                                   | 360                |
| Oscillation range $\Delta\phi$ (°)                   | 0.1                |
| a = c (Å)                                            | 95.51              |
| b (Å)                                                | 157.13             |
| Resolution range (Å)                                 | 47.77-1.72         |
| No. of reflections:                                  |                    |
| total                                                | 1,819,171          |
| unique                                               | 45,433             |
| Multiplicity                                         | 40.0 (39.9)        |
| $\langle I/\sigma(I) \rangle$                        | 34.98 (2.25)       |
| Mosaicity (°)                                        | 0.124              |
| Completeness (%):                                    | 98.9 (93.3)        |
| $R_{\text{merge}}$ (%) **                            | 7.4 (173.9)        |
| $CC_{1/2}$                                           | 1.00 (0.89)        |
| Resolution range (Å)                                 | 47.75-1.72         |
| $R_{\text{factor}}$ (%) †                            | 18.91              |
| (no. of reflections)                                 | 43,036             |
| $R_{\text{free}}$ (%) ††                             | 20.73              |
| (no. of reflections)                                 | 2,267              |
| <b>Refined model</b>                                 |                    |
| No. of chains in AU                                  | 5                  |
| No. of residues                                      | 228                |
| No. of atoms                                         | 2769               |
| No. of water molecules                               | 222                |
| $\langle B \rangle$ factor (Å <sup>2</sup> )         | 38.9               |
| <b>Ramachandran plot</b>                             |                    |
| Favored (%)                                          | 98.1               |
| Allowed (%)                                          | 1.9                |
| Disallowed (%)                                       | 0.0                |
| <b>RMS deviation</b>                                 |                    |
| Bond lengths (Å)                                     | 0.011              |
| Bond angles(deg.)                                    | 1.548              |
| PDB code                                             | <b>6F1F</b>        |

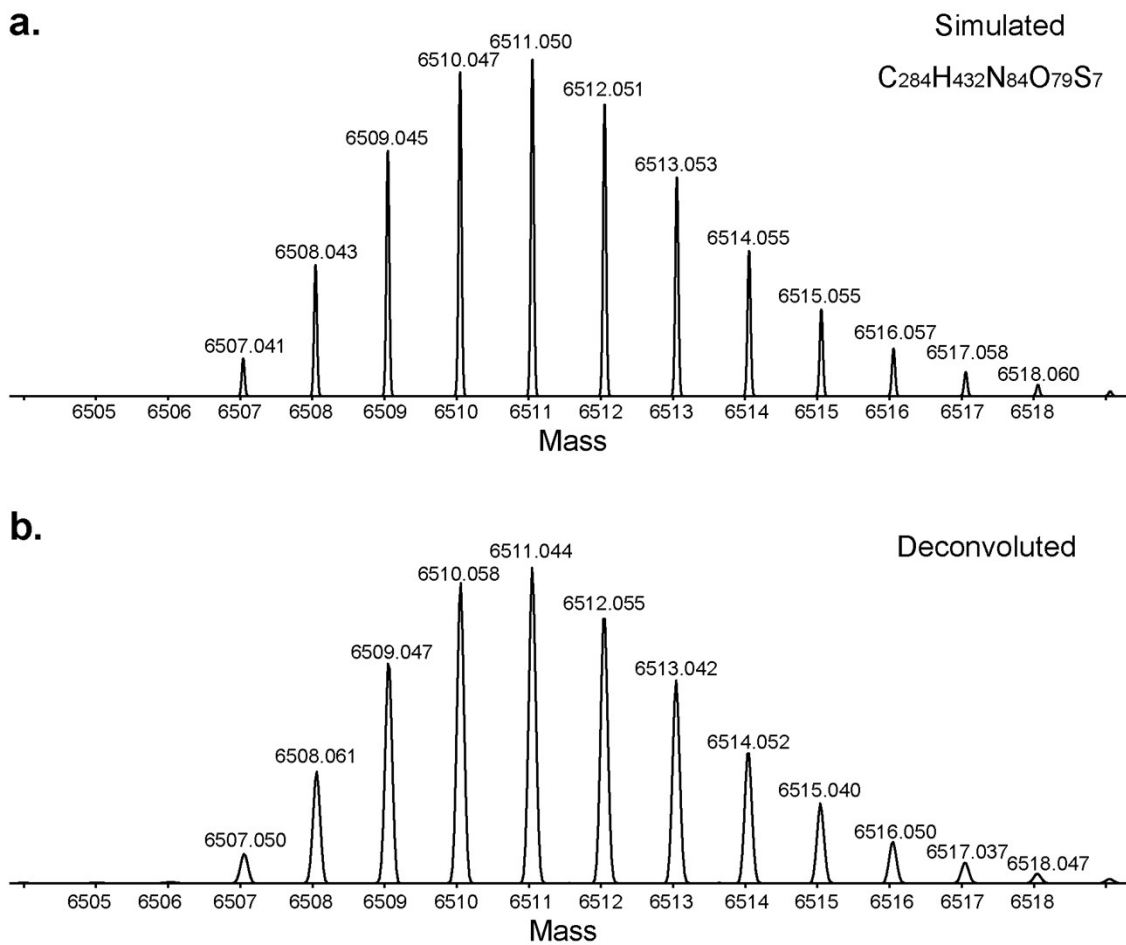

**Figure S14.** HR-MS analysis of WT-BPTI. **a.** The simulated HR-MS of folded WT-BPTI with chemical formula  $C_{284}H_{432}N_{84}O_{79}S_7$  is shown; **b.** The deconvoluted HR-MS of WT-BPTI.

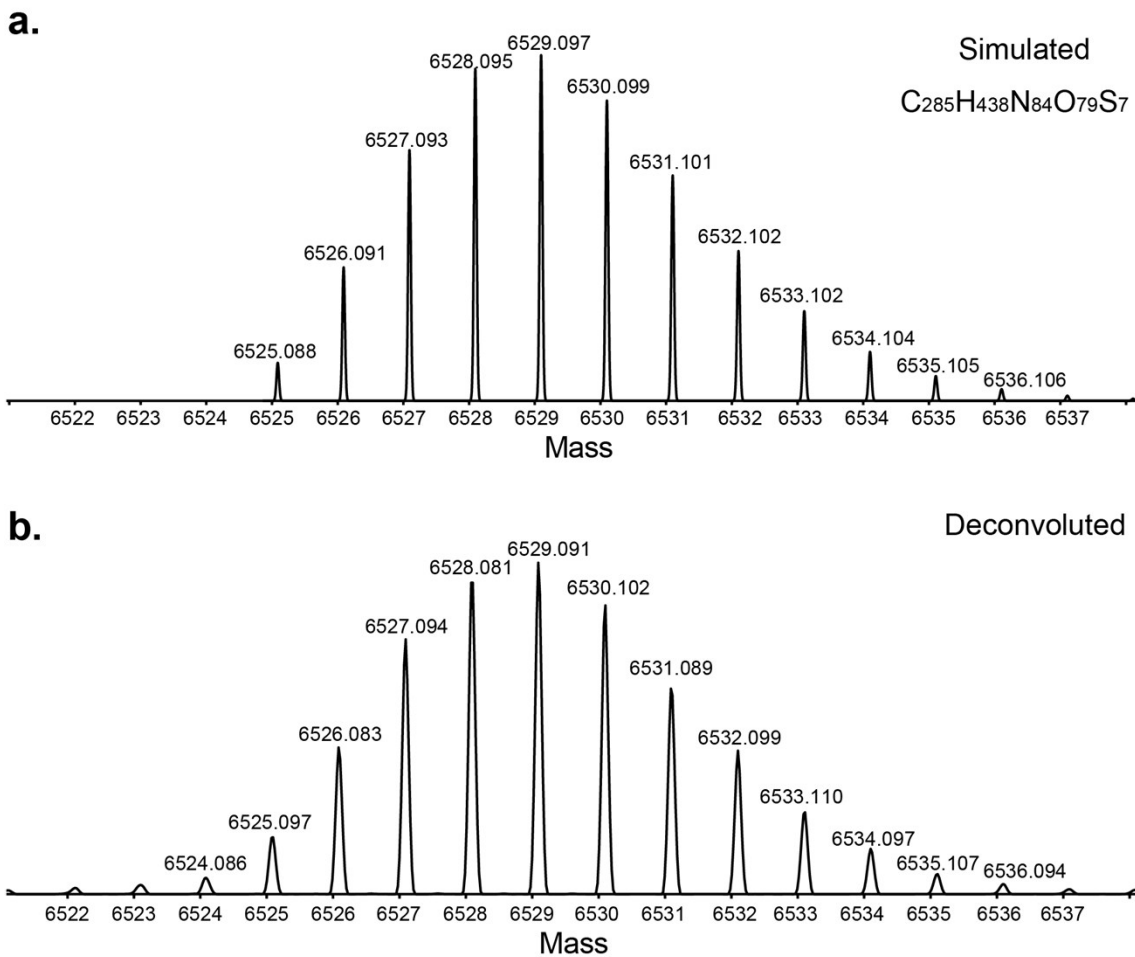

**Figure S15.** HR-MS analysis of reduced MT-BPTI. **a.** The simulated HR-MS of reduced MT-BPTI with chemical formula  $C_{285}H_{438}N_{84}O_{79}S_7$  is shown; **b.** The deconvoluted HR-MS of reduced MT-BPTI.

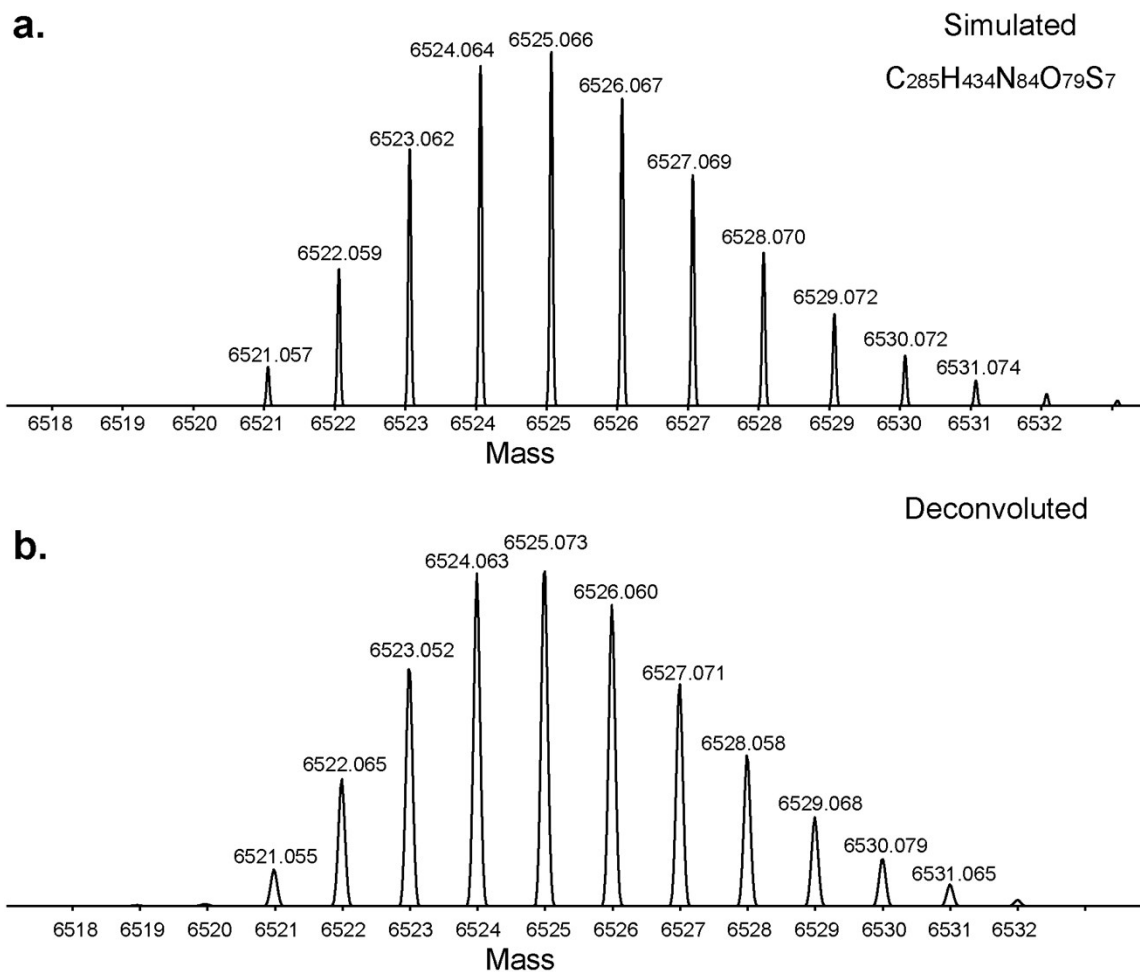

**Figure S16.** HR-MS analysis of folded MT-BPTI. **a.** The simulated HR-MS of reduced MT-BPTI with chemical formula C<sub>285</sub>H<sub>434</sub>N<sub>84</sub>O<sub>79</sub>S<sub>7</sub> is shown; **b.** The deconvoluted HR-MS of reduced MT-BPTI.

## Bibliography

1. J. A. Mendoza, M. B. Jarstfer and D. P. Goldenberg, *Biochemistry*, 1994, **33**, 1143-1148.
2. S. A. Beeser, T. G. Oas and D. P. Goldenberg, *J. Mol. Biol.*, 1998, **284**, 1581-1596.
3. C. M. B. K. Kourra and N. Cramer, *Chem. Sci.*, 2016, **7**, 7007-7012.
4. J. S. Weissman and P. S. Kim, *Science*, 1991, **253**, 1386-1393.
5. N. Metanis and D. Hilvert, *Chem. Sci.*, 2015, **6**, 322-325.
6. N. Metanis and D. Hilvert, *Angew. Chem. Int. Ed.*, 2012, **51**, 5585-5588.
7. M. J. M. Castro and S. Anderson, *Biochemistry*, 1996, **35**, 11435-11446.
8. C. N. Pace, F. Vajdos, L. Fee, G. Grimsley and T. Gray, *Prot. Sci.*, 1995, **4**, 2411-2423.
9. J. W. Williams and J. F. Morrison, *Methods Enzym.*, 1979, **63**, 437-467.
10. W. Kabsch, *Acta Crystallogr. D.*, 2010, **66**, 125-132.
11. A. J. McCoy, R. W. Grosse-Kunstleve, P. D. Adams, M. D. Winn, L. C. Storoni and R. J. Read, *J. Appl. Crystallog.*, 2007, **40**, 658-674.
12. J. Lubkowski and A. Wlodawer, *Acta Crystallogr. D*, 1999, **55**, 335-337.
13. P. Emsley and K. Cowtan, *Acta Crystallogr. D.*, 2004, **60**, 2126-2132.
14. P. V. Afonine, R. W. Grosse-Kunstleve, N. Echols, J. J. Headd, N. W. Moriarty, M. Mustyakimov, T. C. Terwilliger, A. Urzhumtsev, P. H. Zwart and P. D. Adams, *Acta Crystallogr. D.*, 2012, **68**, 352-367.
15. R. A. Laskowski, M. W. Macarthur, D. S. Moss and J. M. Thornton, *J. Appl. Crystallogr.*, 1993, **26**, 283-291.
16. V. B. Chen, W. B. Arendall, J. J. Headd, D. A. Keedy, R. M. Immormino, G. J. Kapral, L. W. Murray, J. S. Richardson and D. C. Richardson, *Acta Crystallogr. D*, 2010, **66**, 12-21.
17. P. W. Rose, C. X. Bi, W. F. Bluhm, C. H. Christie, D. Dimitropoulos, S. Dutta, R. K. Green, D. S. Goodsell, A. Prlic, M. Quesada, G. B. Quinn, A. G. Ramos, J. D. Westbrook, J. Young, C. Zardecki, H. M. Berman and P. E. Bourne, *Nucleic Acids Res*, 2013, **41**, D475-D482.
